# Supplementary material for: NFAT4-dependent miR-324-5p regulates mitochondrial morphology and cardiomyocyte cell death by targeting Mtfr1
Source: PubMed Central journal article supplement (PMC4720883; doi:10.1038/cddis.2015.348), 2015-12-03

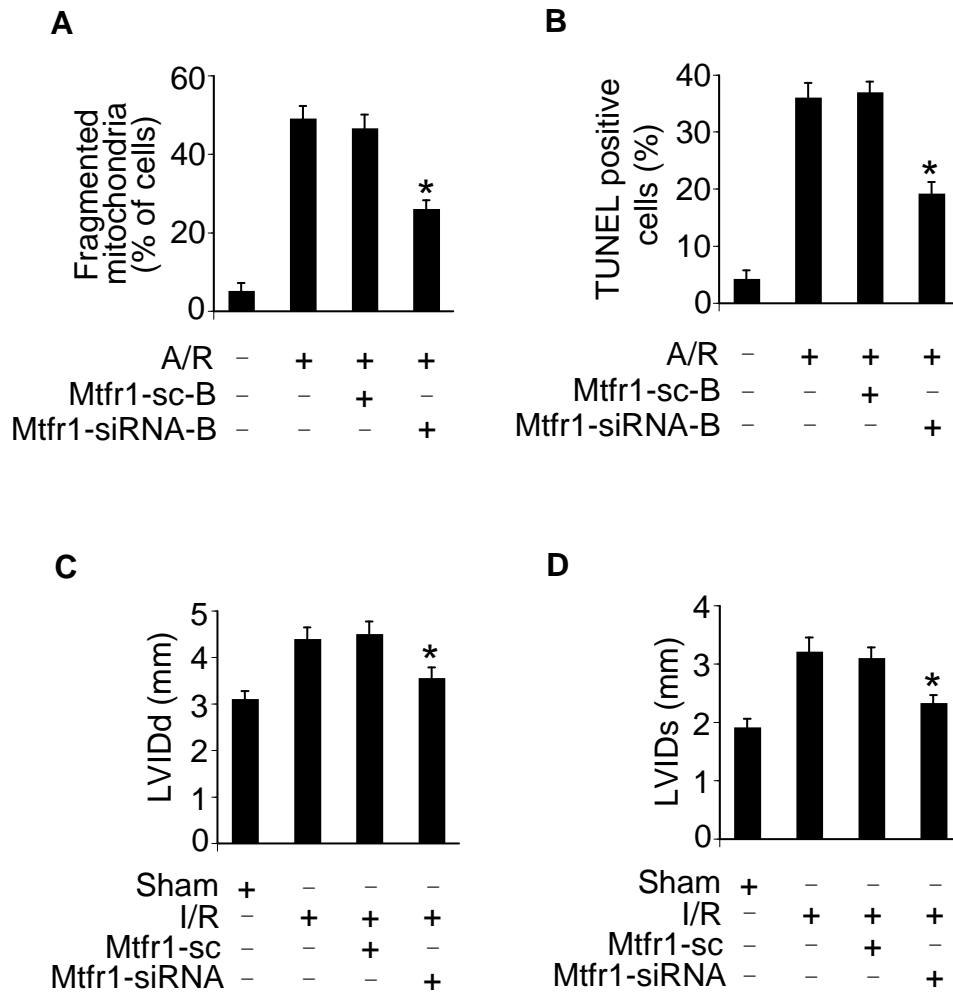

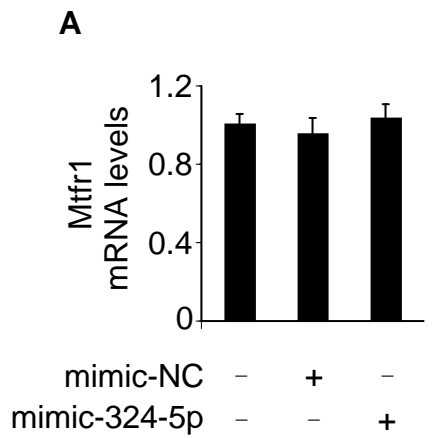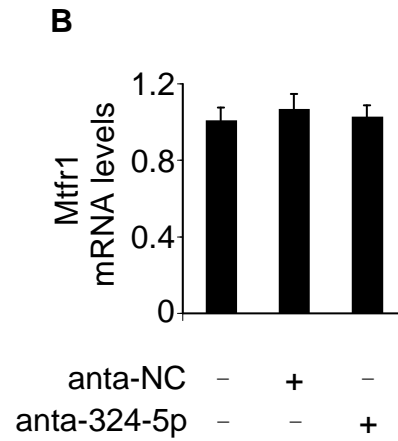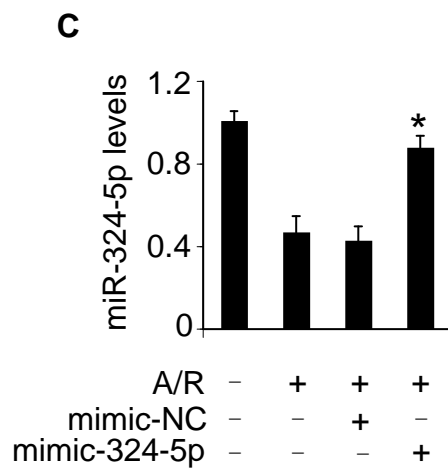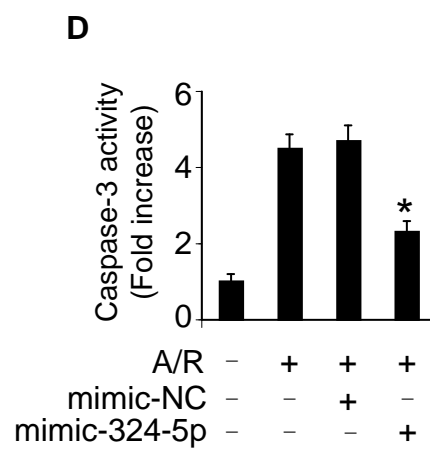

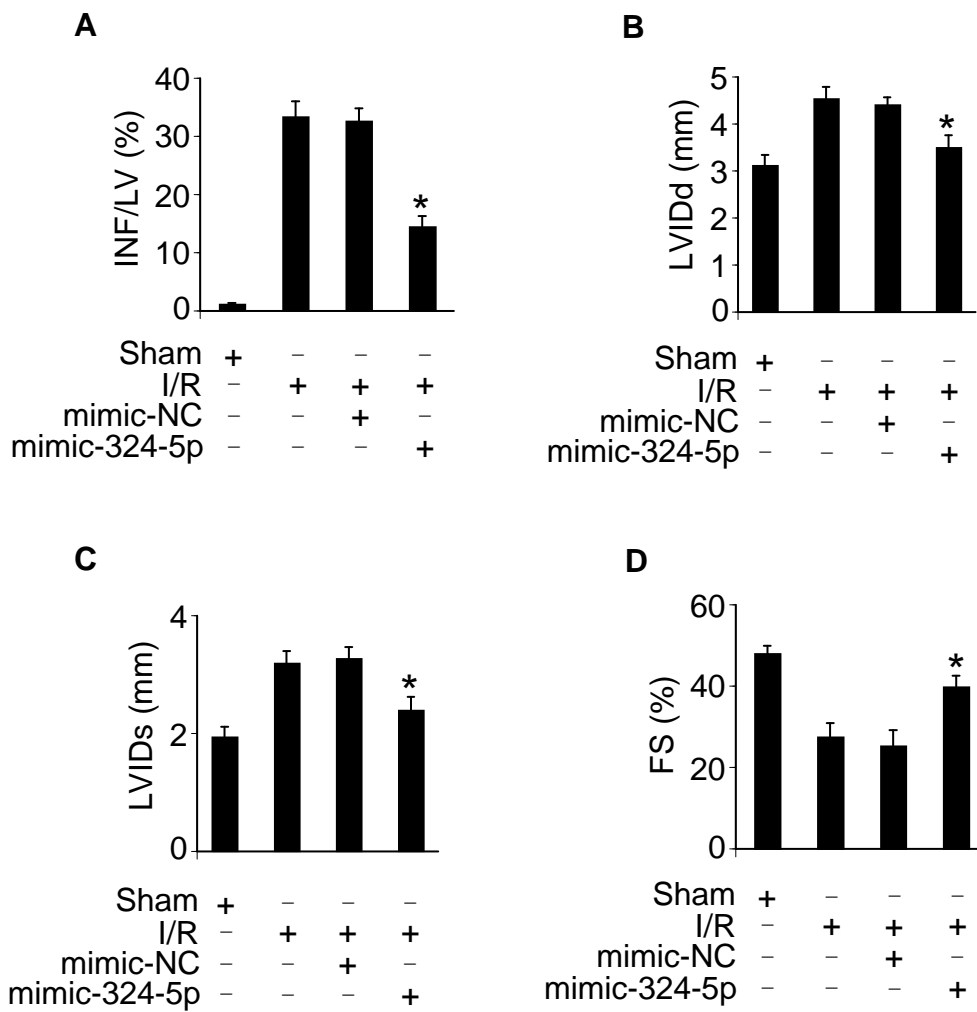

**A**

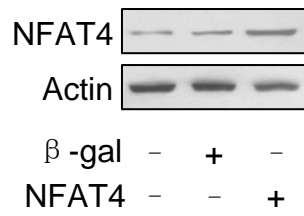

**B**

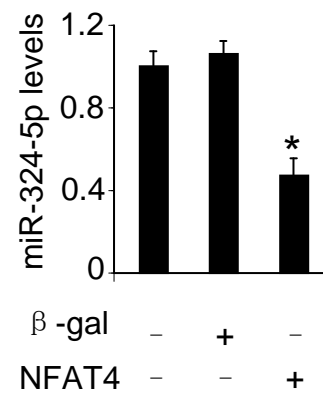

**C**

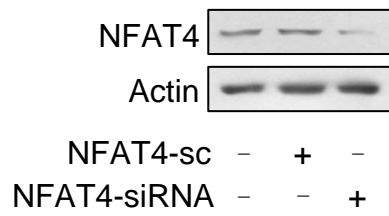

**D**

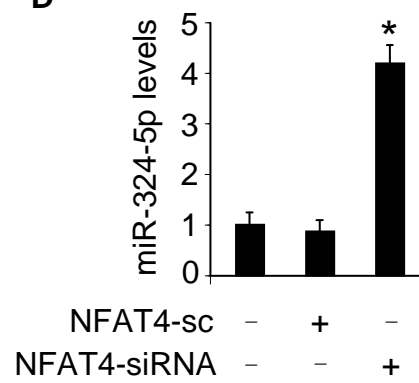

**A**

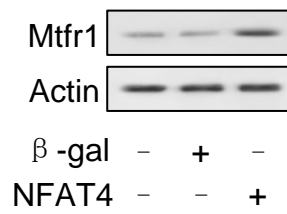

**B**

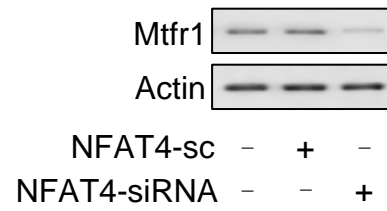

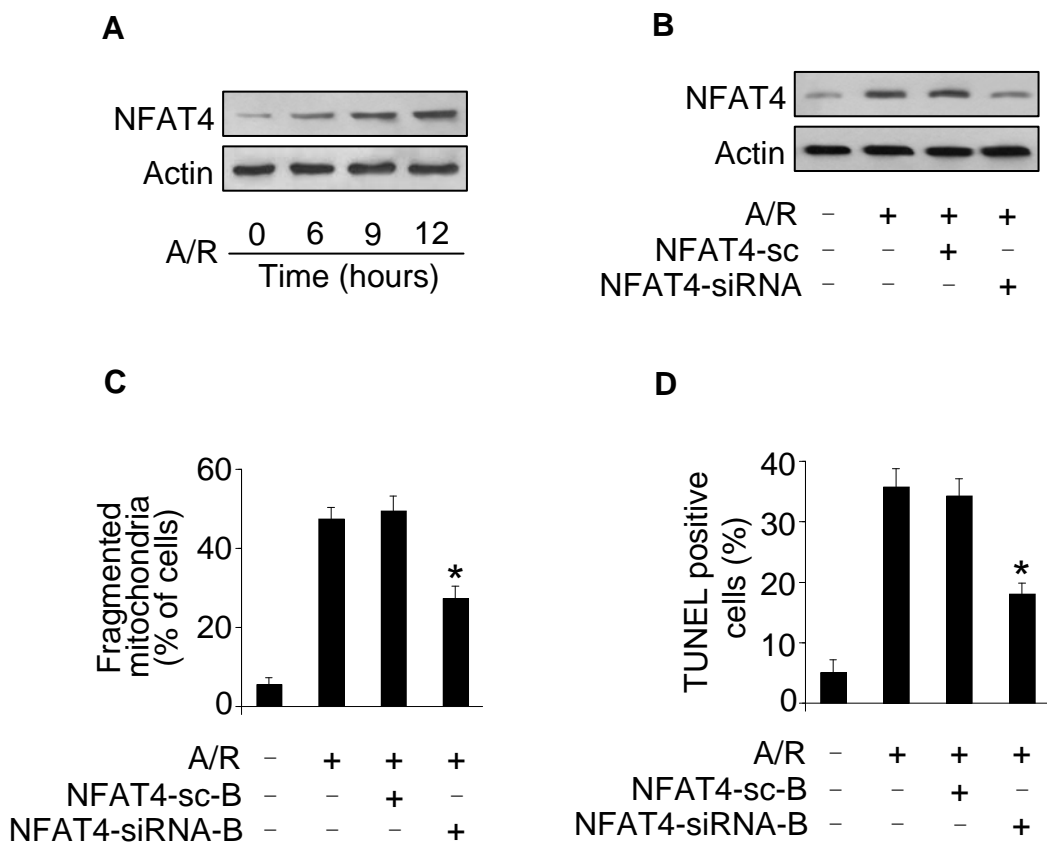

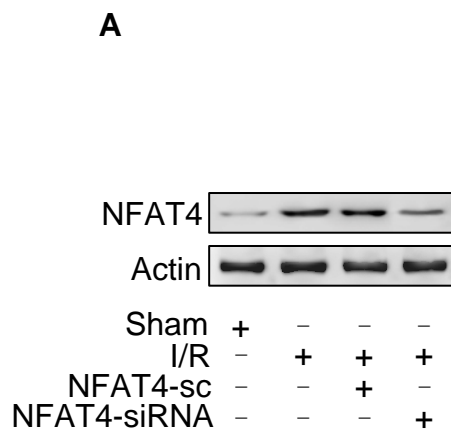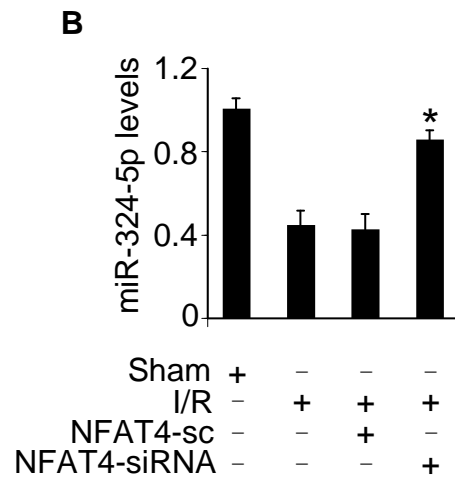

Supplement: cddis2015348x2.pdf [file cddis2015348x2.pdf]
